# Supplementary material for: Vesicles of 2-ketooctanoic acid in water
Source: Royal Society of Chemistry journal article supplement (doi:10.1039/c6sm02665f), 2017-01-01
Supplement: c6sm02665f1.pdf [file c6sm02665f1.pdf]

## Electronic Supplementary Information

### Vesicles of 2-Ketooctanoic Acid in Water: A Plausible Protocell Model

Huifang Xu, Na Du, Yawen Song, Shue Song, Wanguo Hou \*

*Key Laboratory of Colloid and Interface Chemistry (Ministry of Education),  
Shandong University, Jinan 250100, P.R. China*

#### Measurements

*Nuclear magnetic resonance (NMR) Spectroscopy.*  $^1\text{H}$  NMR spectra were recorded at  $25.0 \pm 0.1$  °C on a Brüker Advance 400 spectrometer (Brüker, Switzerland) equipped with a pulse field gradient module (Z-axis), using a 5 mm BBO probe at a frequency of 400.13 MHz. Samples for  $^1\text{H}$  NMR were prepared in  $\text{D}_2\text{O}$ .

*Electrospray Ionization Mass (ESI-MS) Spectrometry.* ESI-MS spectra were recorded on an Agilent 6510 Q-TOF mass spectrometer (Agilent, USA).

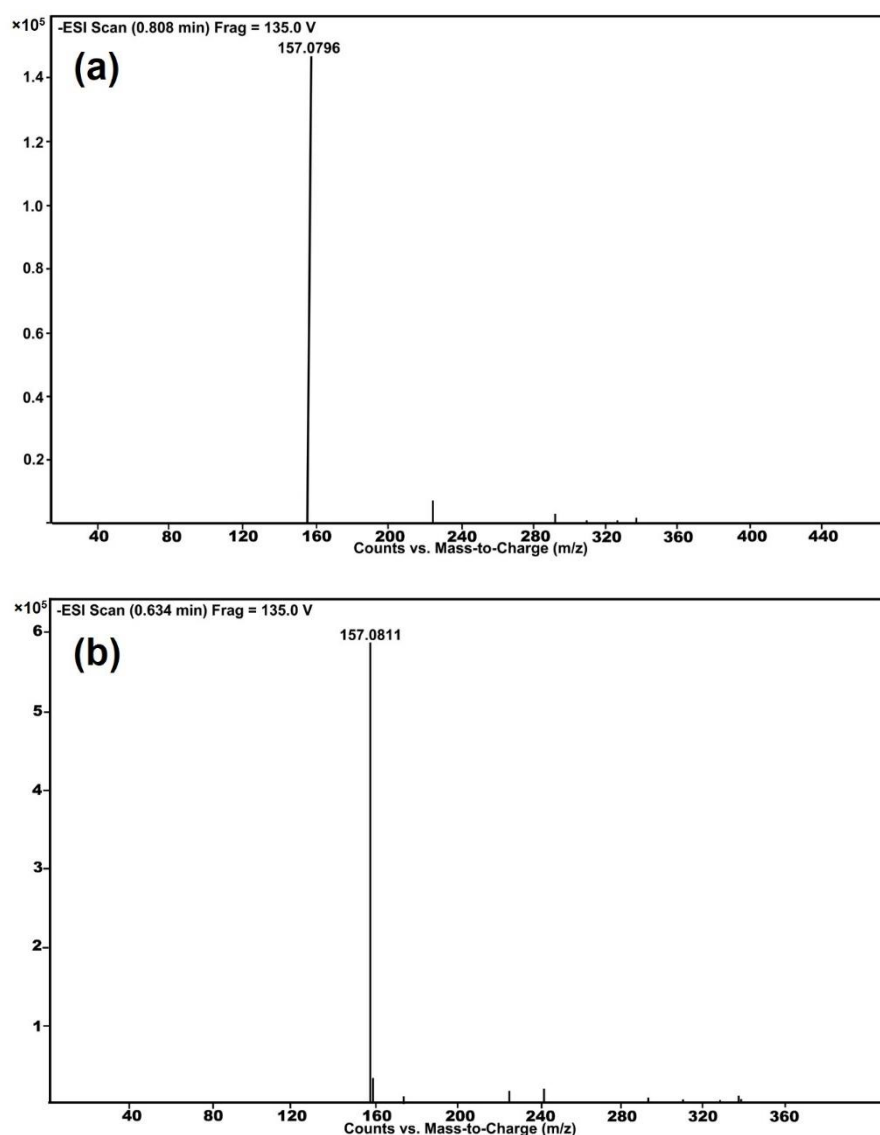

**Fig. S1** ESI-MS spectra of KOCOOH solution (a) before and (b) after the experiments. No chemically bonded KOCOOH-KOCOOH dimers ( $317.2\ m/z$ ) were detected, and only a single peak of KOCOOH monomer ( $157.1\ m/z$ ) was observed. Small peaks (at  $m/z$  close to 220, 240 etc) probably arise from contaminants existing in the KOCOOH sample, as suggested by Griffith et al. (Photoinitiated synthesis of self-assembled vesicles, *J. Am. Chem. Soc.* **2014**, *136*, 3784–3787).

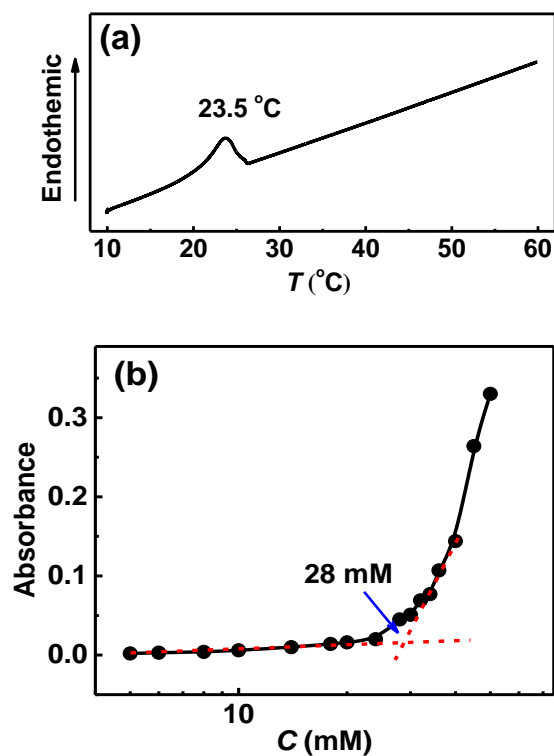

**Fig. S2** (a) DSC trace of KOCOOH reagent. (b) Absorbance (at 400 nm) of KOCOOH aqueous solutions as a function of concentration.

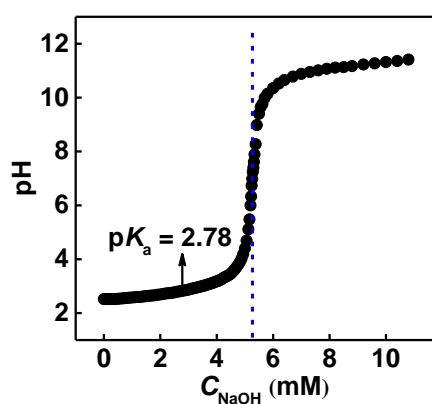

**Fig. S3** pH titration curve of KOCOOH solution (6 mM) at  $25^{\circ}\text{C}$ . The inflection points (at  $\text{pH} \sim 7$  in our case) of pH titration curves are commonly thought to correspond to the complete ionization of weakly acidic surfactants, and the pH values ( $\sim 2.78$  in our case) at half the ionization volume (i.e., half the NaOH volume required to reach the complete ionization end point) are defined as the  $\text{p}K_a$  of the surfactants.

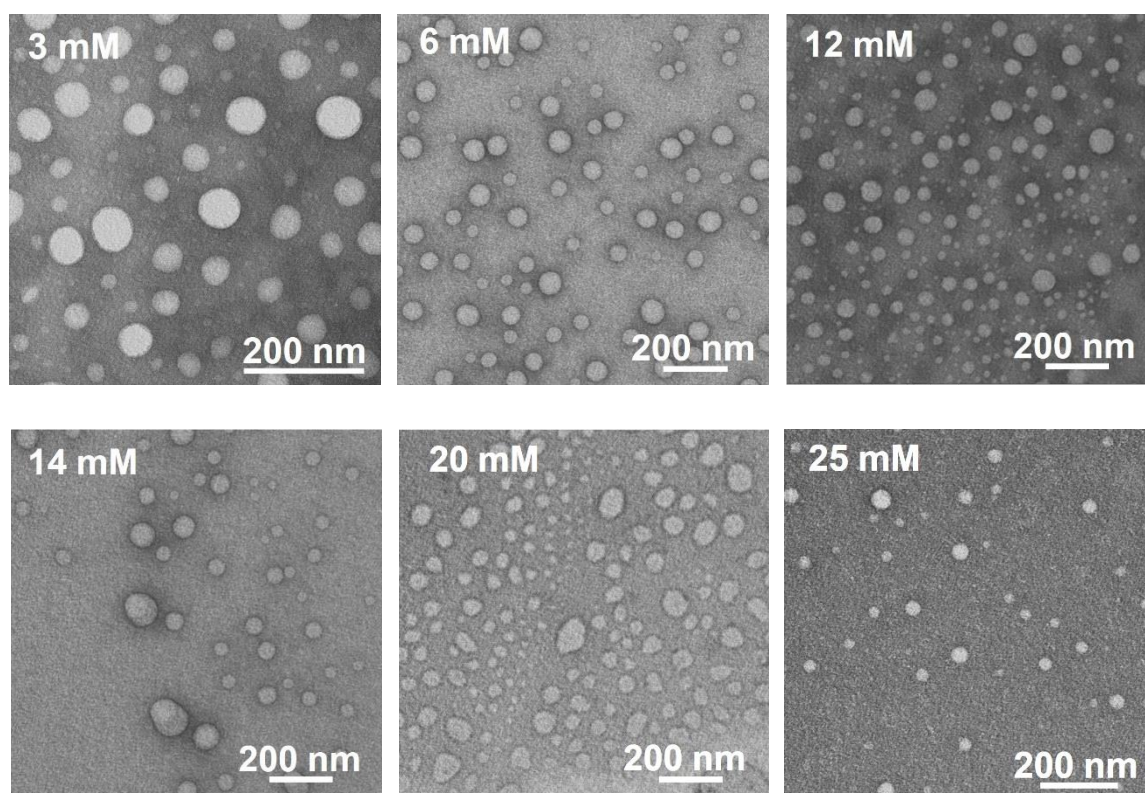

**Fig. S4** NS-TEM images of KOCOOH solutions with various concentrations.

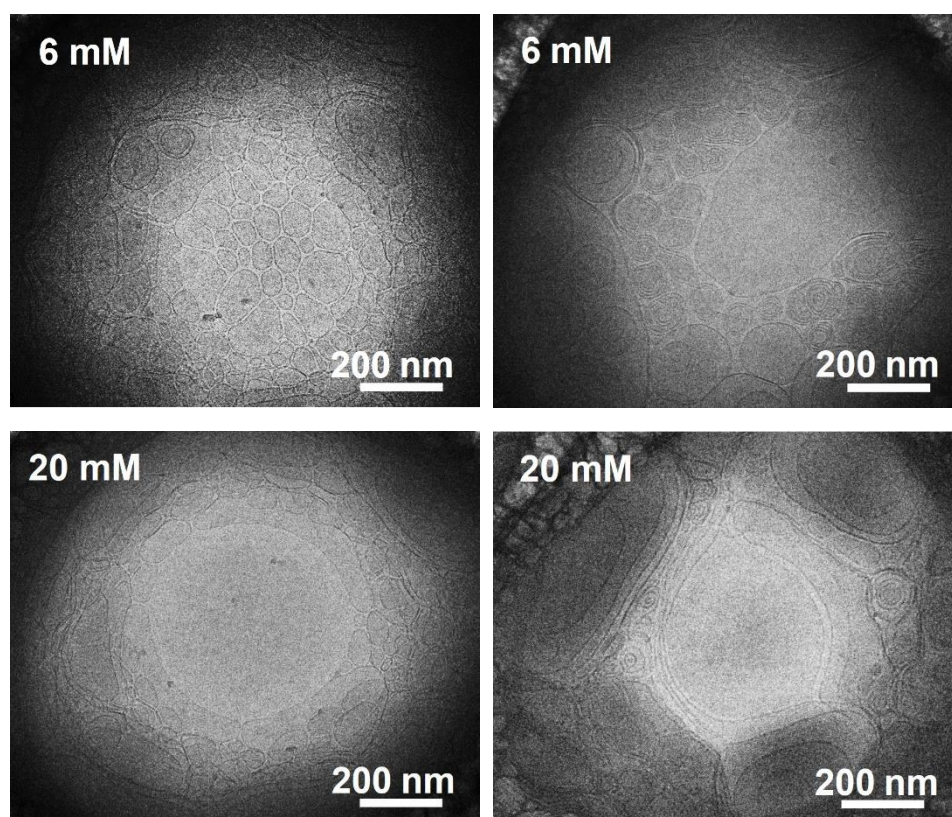

**Fig. S5** Cryo-TEM images of KOCOOH solutions with 6 and 20 mM.

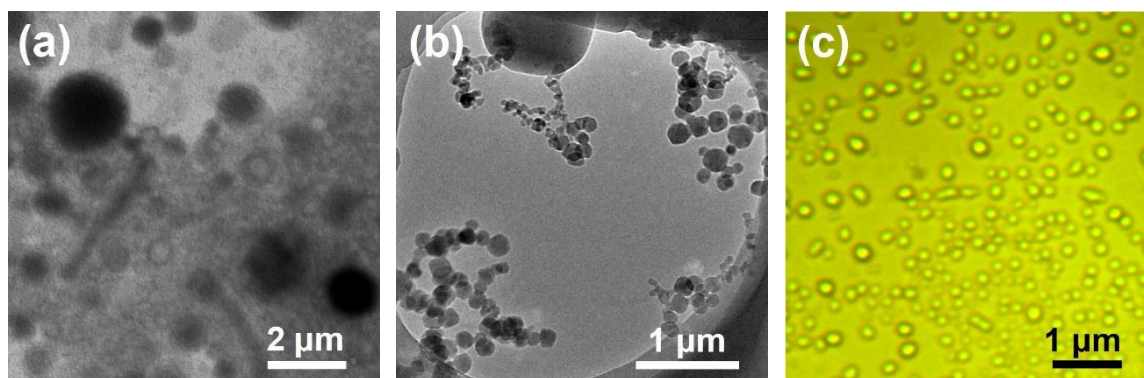

**Fig. S6** (a) NS-TEM, (b) cryo-TEM images and (c) optical photograph of KOCOOH solution with 50 mM.

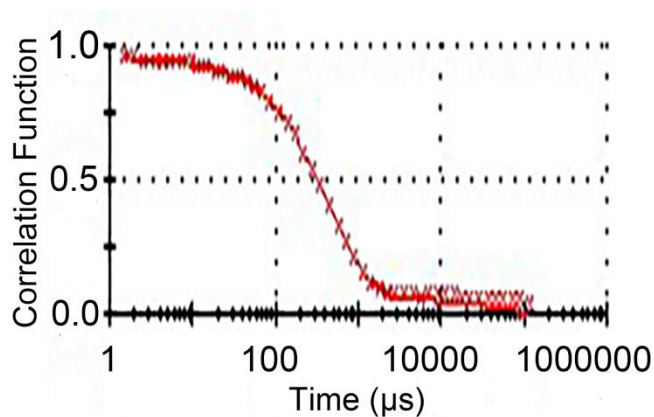

**Fig. S7** Correlation function of KOCOOH aqueous solution (20 mM, pH = 2.2).

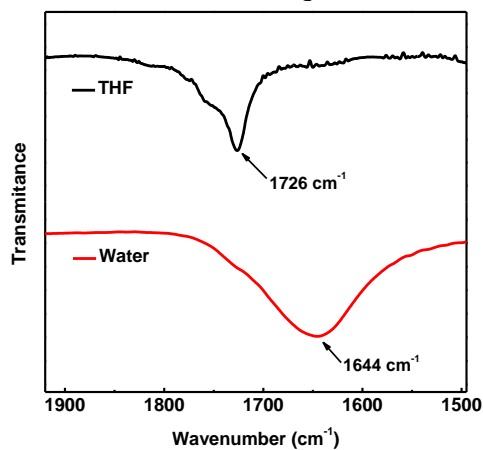

**Fig. S8** FTIR spectra of KOCOOH in THF and water. The absorption peak corresponding to carbonyl stretching appears at  $\sim 1726\text{ cm}^{-1}$  in THF, while shifts to  $1644\text{ cm}^{-1}$  in water. This suggests that there exists hydrogen bonding between head groups (carboxyl groups) in vesicles, based on the previous reports (Ref. 45, Mondal et al., Langmuir, 2013, 29, 6746–6753).

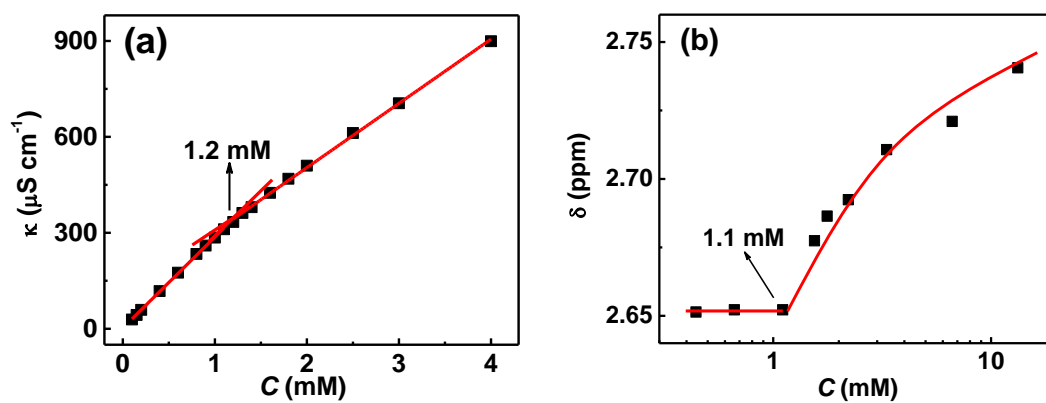

**Fig. S9** (a) Change in conductivity ( $\kappa$ ) of KOCO OH solutions versus concentration. (b) Change in chemical shift ( $\delta$ ) of  $\beta$ -methylene protons of KOCO OH in  $\text{D}_2\text{O}$  versus concentration. Breakpoints can be observed, indicating that aggregation of KOCO OH molecules occurred.

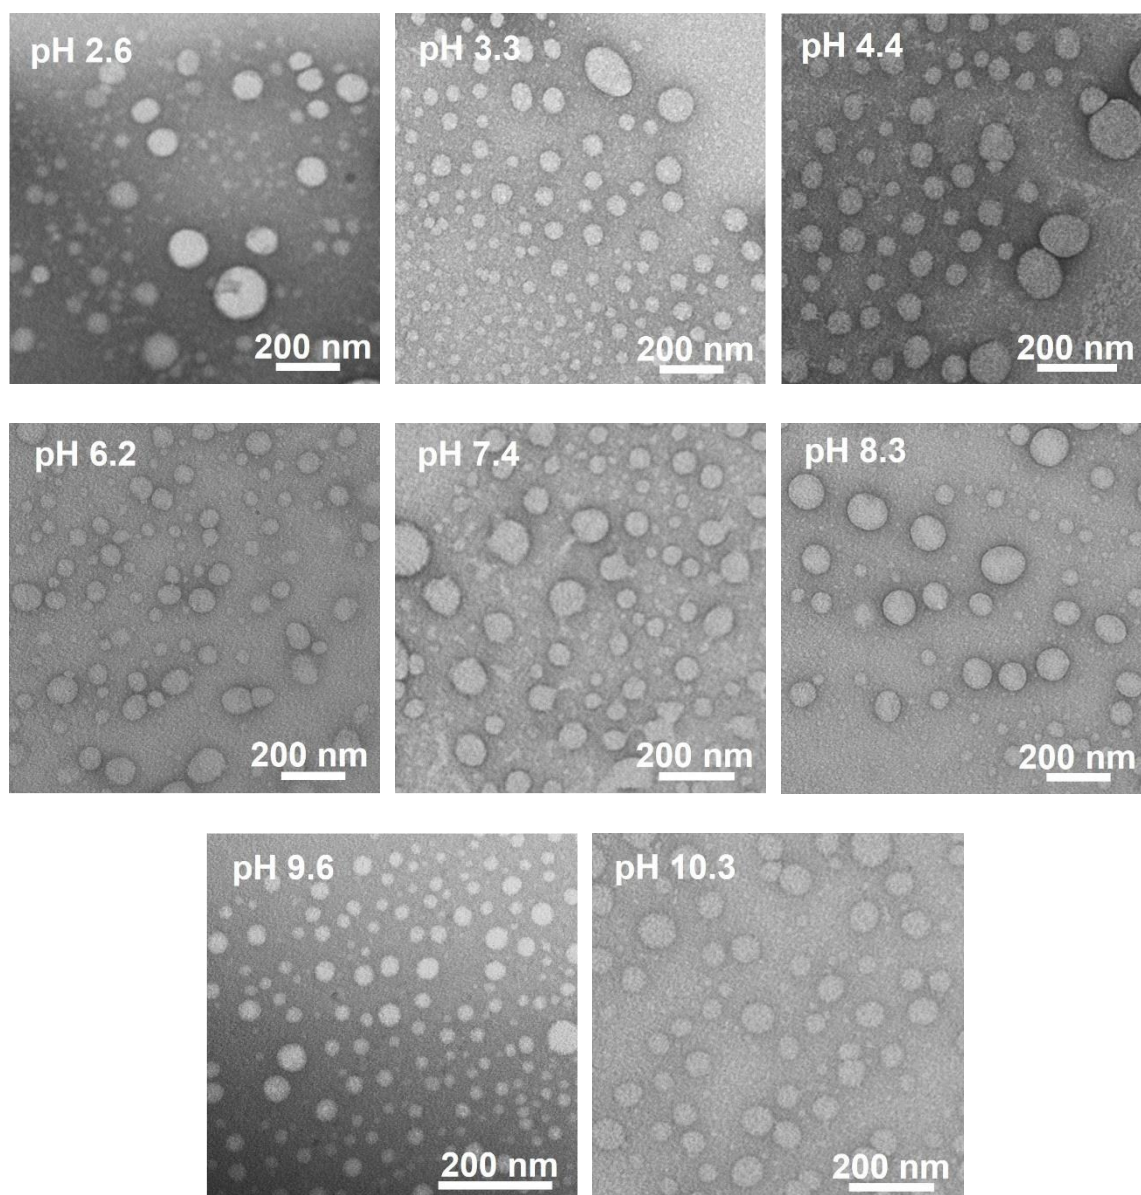

**Fig. S10** NS-TEM images of KOCOOH solutions (6 mM) at various pH.

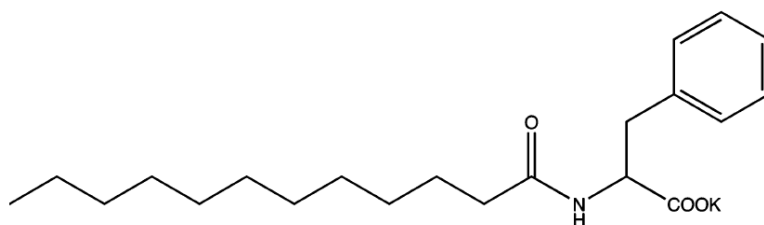

**Fig. S11** Chemical structure of potassium *N*-dodecanoyl *L*-phenylalaninate.
